# Supplementary material for: ACTION-IO as a platform to understand differences in perceptions, attitudes, and behaviors of people with obesity and physicians across countries – the Israeli experience
Source: Springer Nature journal article supplement (doi:10.1186/s13584-020-00404-2), 2020-10-21
Supplement: MOESM1 [file 18508590]

# Additional file 1

Supplement for: Dror Dicker, et al. ACTION-IO as a platform to understand differences in perceptions, attitudes, and behaviors of people with obesity and physicians across countries – the Israeli experience

Additional file 1

TABLE S1 Demographics and characteristics of the respondents who suspended or completed the survey.

| Israeli PwO                                               | PwO, suspended survey <sup>†</sup> (n = 323) | PwO, completed survey (n = 750) |
|-----------------------------------------------------------|----------------------------------------------|---------------------------------|
| Age, years [n = 181]                                      | 41                                           | 43                              |
| Gender, (%) [n = 179]                                     |                                              |                                 |
| Female                                                    | 65                                           | 65                              |
| Male                                                      | 35                                           | 35                              |
| BMI, kg/m <sup>2</sup> [n = 57]                           | 34                                           | 36                              |
| BMI classification, (%)                                   |                                              |                                 |
| Obesity Class I (30–34.9 kg/m <sup>2</sup> ) <sup>‡</sup> | 77                                           | 65                              |
| Obesity Class II (35–39.9 kg/m <sup>2</sup> )             | 18                                           | 23                              |
| Obesity Class III (≥40 kg/m <sup>2</sup> ) <sup>‡</sup>   | 5                                            | 12                              |

| Israeli physicians                | Physicians, suspended survey <sup>§</sup> (n = 155) | Physicians, completed survey (n = 169) |
|-----------------------------------|-----------------------------------------------------|----------------------------------------|
| Age, years [n = 60]               | 52                                                  | 54                                     |
| Gender, (%) [n = 66]              |                                                     |                                        |
| Female                            | 55                                                  | 53                                     |
| Male                              | 45                                                  | 47                                     |
| Physician specialty, (%) [n = 57] |                                                     |                                        |
| Family practice                   | 37                                                  | 33                                     |
| Internal medicine                 | 21                                                  | 26                                     |
| Endocrinology                     | 16                                                  | 20                                     |
| Gastroenterology                  | 14                                                  | 12                                     |
| General practice                  | 2                                                   | 7                                      |
| Other                             | 10                                                  | 2                                      |

Abbreviations: BMI, body mass index; PwO, people with obesity.  
Data are presented as mean or percentage. All PwO and physician data are not weighted, therefore, all N sizes and percentages are unweighted data.  
<sup>†</sup>A total of 323 PwO suspended the survey; n = 274 suspended within the initial screening questionnaire and n = 49 completed the screening questionnaire and suspended within the main survey. The N sizes for each metric are variable, depending on where respondents suspended within the screening questionnaire or main survey, and are provided in the left-hand column.  
<sup>‡</sup>P = 0.05.  
<sup>§</sup>A total of 155 physicians suspended the survey; n = 117 suspended within the initial screening questionnaire and n = 38 completed the screening questionnaire and suspended within the main survey. The N sizes for each metric are variable, depending on where respondents suspended within the screening questionnaire or main survey, and are provided in the left-hand column.

Additional file 1

FIGURE S1 Attitudes towards obesity

Thoughts on impact of different health conditions on a person's overall health. Physicians = green; PwO = orange. Abbreviations: COPD, chronic obstructive pulmonary disease; PwO, people with obesity.

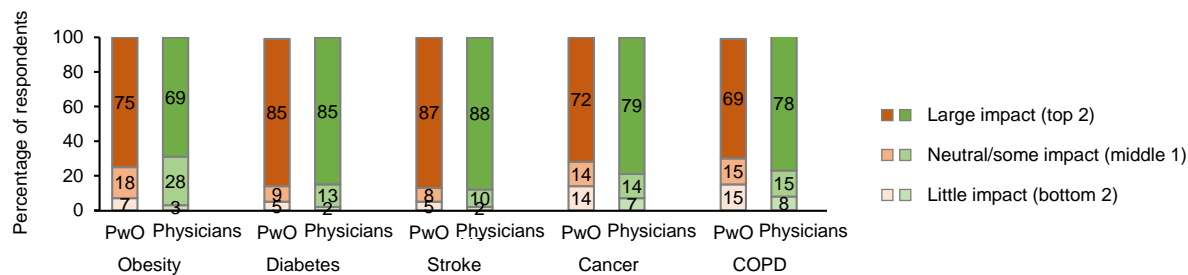

PwO familiar with condition, n = 750; physicians, n = 169; Q405; rated on a scale where 1 = very little impact, 5 = extreme impact.

**FIGURE S2** Agreement with statements about weight loss barriers  
Physicians = green; PwO = orange. Abbreviations: PwO, people with obesity.

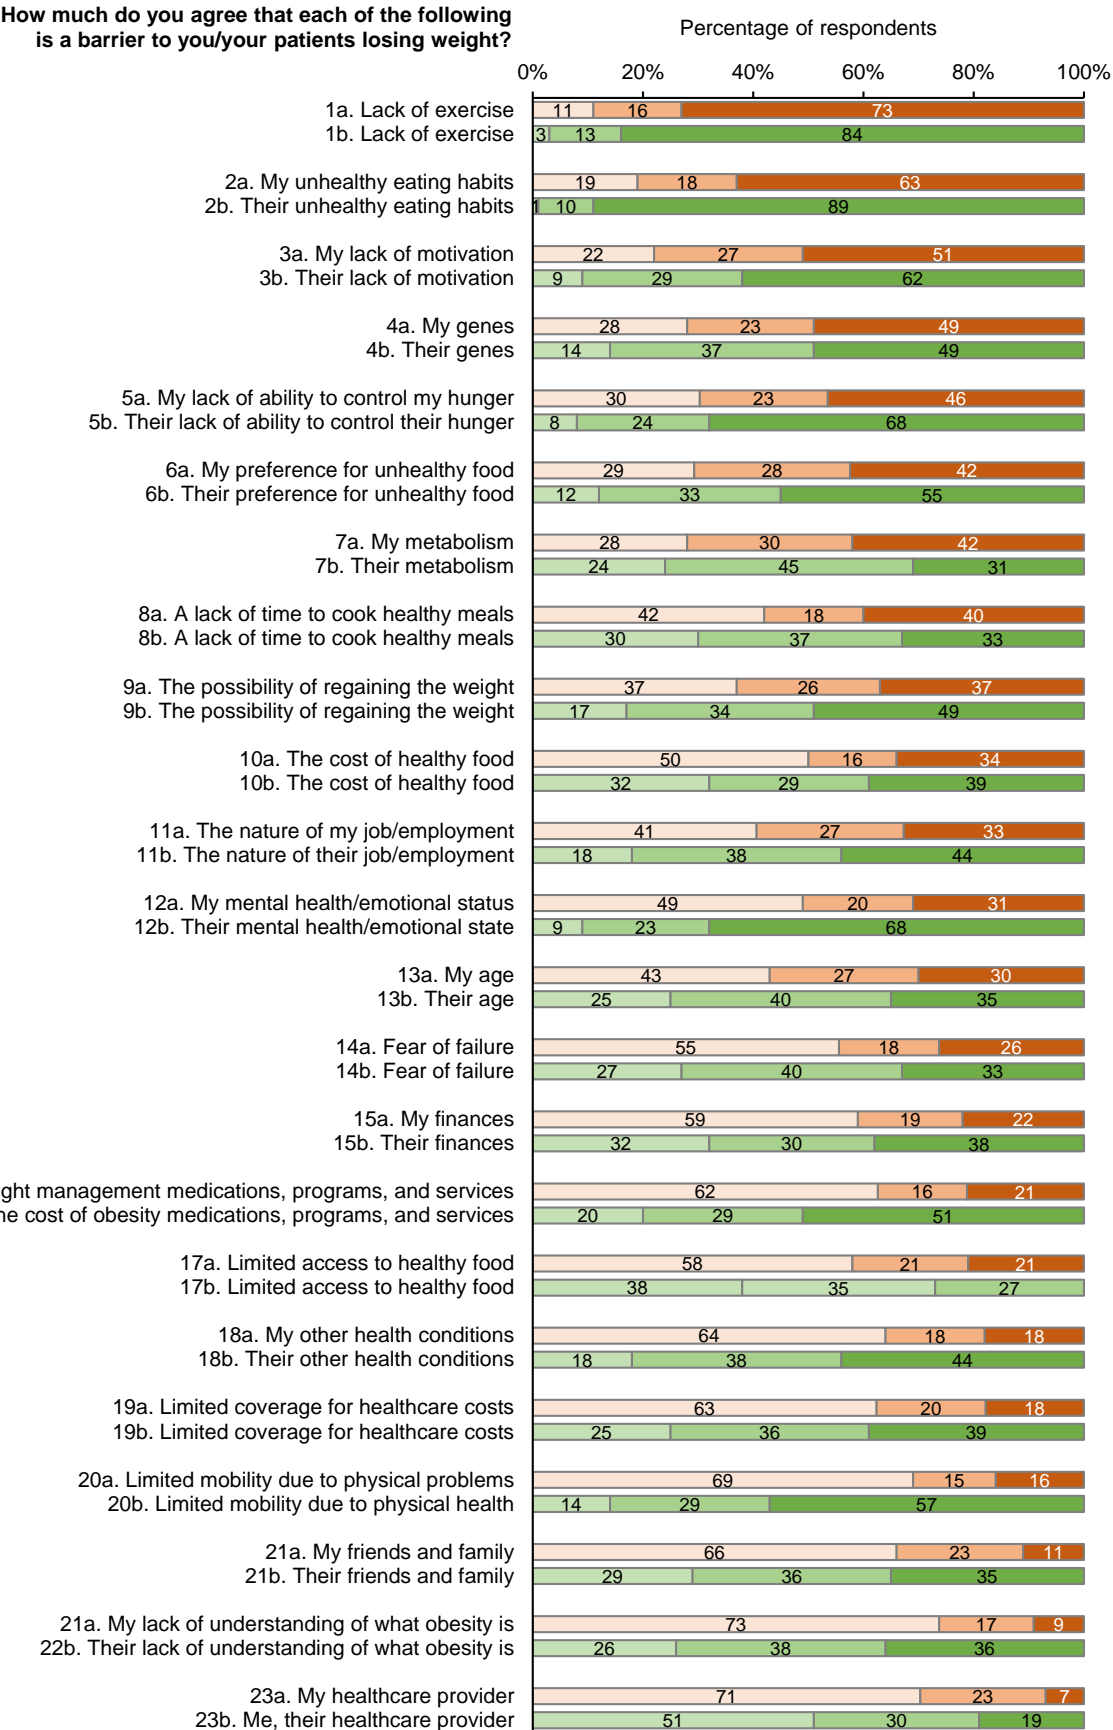

PwO, n = 750; Physicians, n = 169; Q507; rated on a scale where 1 = do not agree at all, 5 = completely agree.

Do not agree (bottom 2) Neutral/somewhat agree (middle 1) Agree (top 2)

Additional file 1

**FIGURE S3** Proportion of patients who responded to weight loss effort, reported by physicians  
Chart shows the proportion of patients who made a serious weight loss effort within the past year who were defined as successful by physicians.

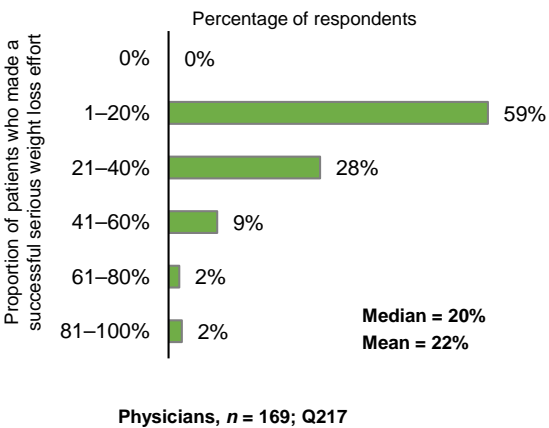

Additional file 1

**FIGURE S4** Initiation of weight management conversations

(A) Proportion of PwO who discussed weight with an HCP (physician, nurse, etc.) in the past 5 years, and who initiated the conversation. (B) Proportion of patients with whom physicians discussed weight, and who initiated the conversation. Physicians = green; PwO = orange. Abbreviations: HCP, healthcare professional; PwO, people with obesity.

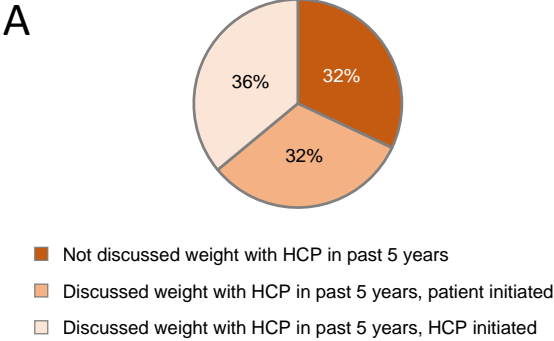

**PwO, *n* = 511; Q120 and Q701**

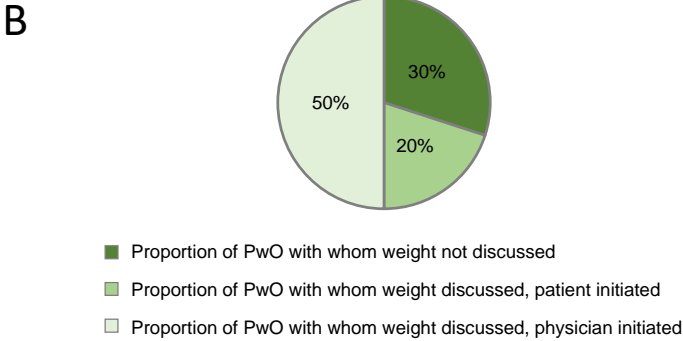

**Physicians, *n* = 169; Q235A and Q702**

Additional file 1

**FIGURE S5** Physician criteria for initiating weight management conversations  
Abbreviations: BMI, body mass index.

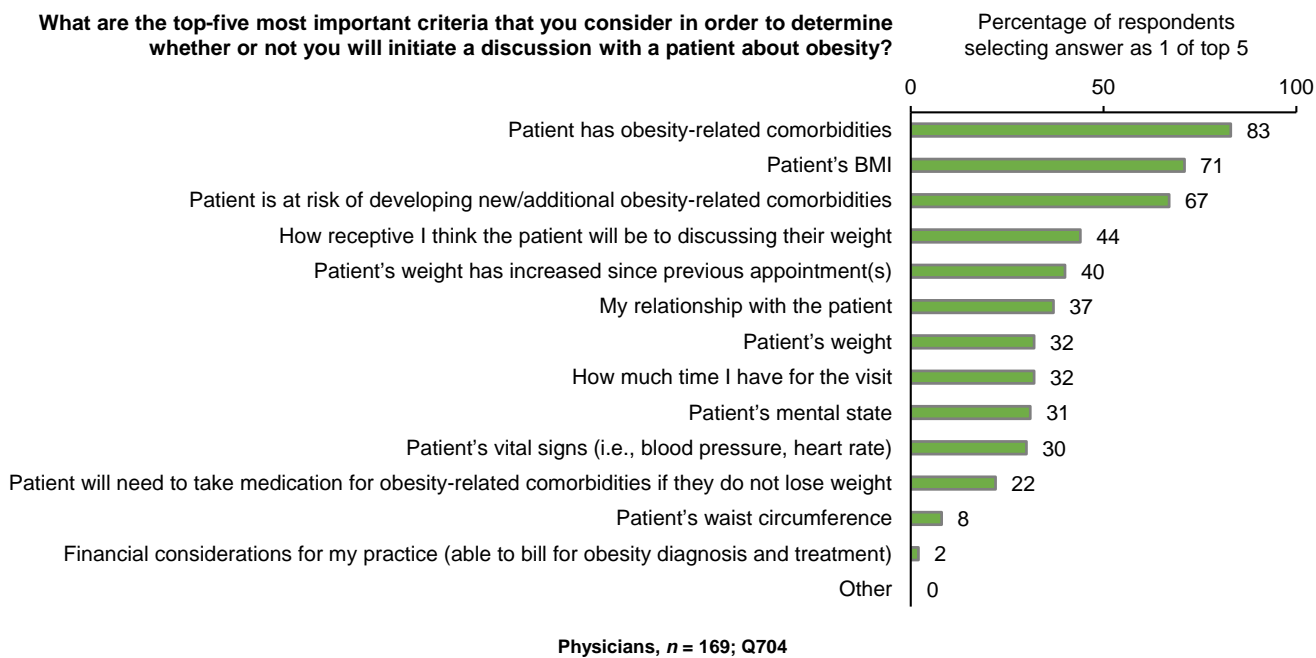

Additional file 1

**FIGURE S6** How helpful PwO found their conversation with an HCP (physician, nurse, etc.) about weight management  
Abbreviations: HCP, healthcare professional; PwO, people with obesity.

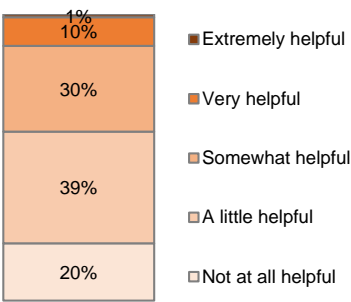

PwO, discussed weight with HCP (physician nurse, etc.) in the past 5 years, *n* = 511; Q700C



Additional file 1

**FIGURE S7** Weight management methods discussed/recommended and perceived effectiveness  
(A) Weight management methods discussed with an HCP reported by PwO and treatment recommended to patients reported by physicians. (B) Perceived effectiveness of weight management methods. Physicians = green; PwO = orange. Abbreviations: HCP, healthcare professional; PwO, people with obesity; QoL, quality of life.

**A Discussed**

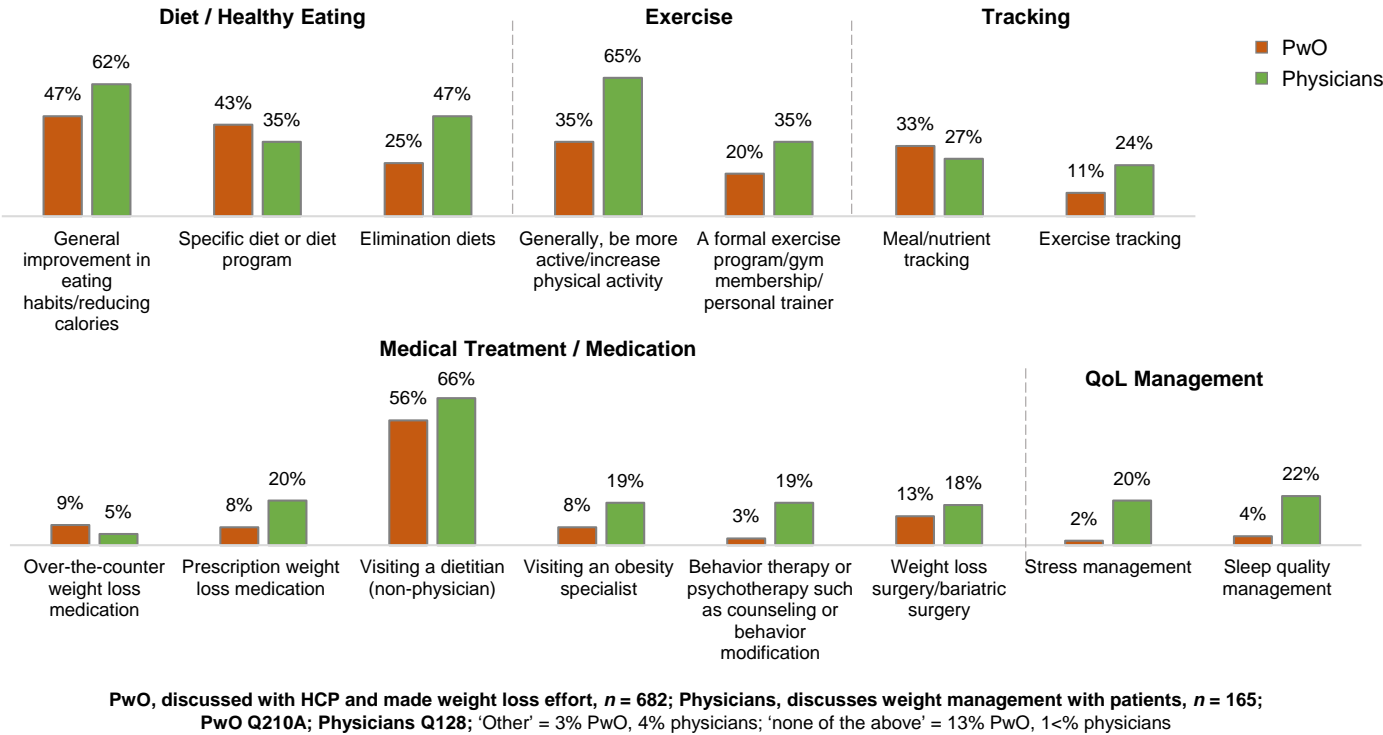

**B Perceived as effective**

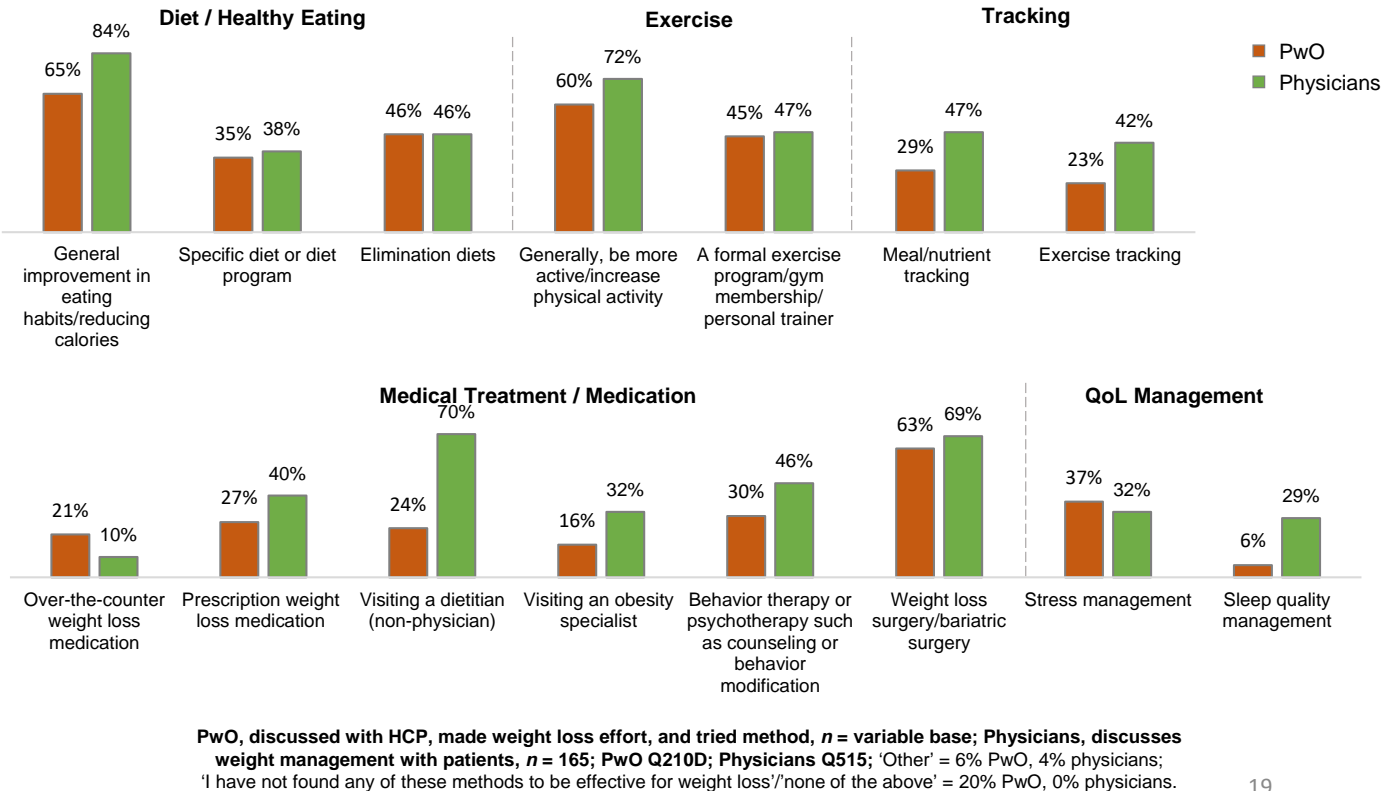

Additional file 1

**FIGURE S8** Reasons for not discussing weight with an HCP (PwO responses) or patient (physician responses)  
physicians = green; PwO = orange. Abbreviations: HCP, healthcare professional; PwO, people with obesity.

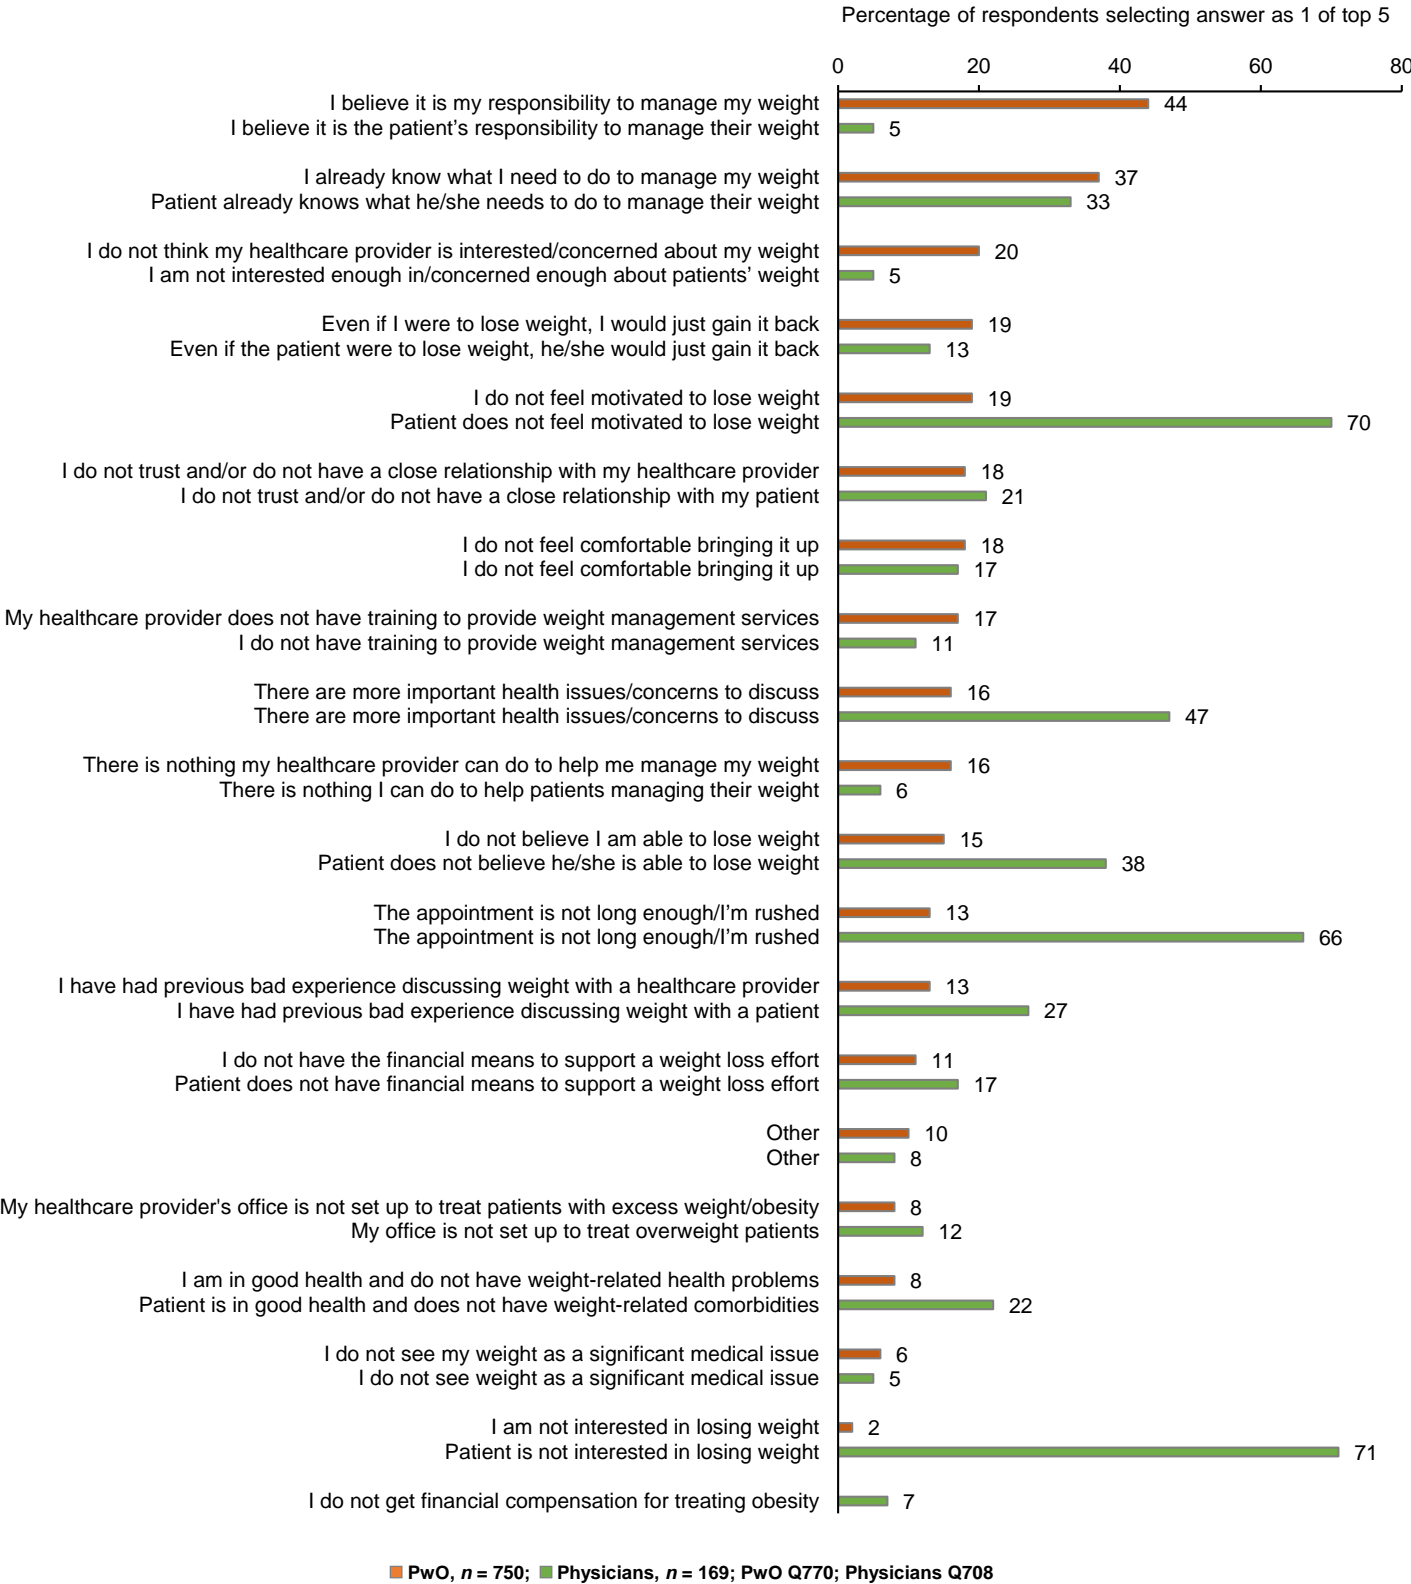

Additional file 1

**FIGURE S9** Healthcare professionals with whom PwO would consider having weight management discussions  
Of PwO who had not discussed weight with an HCP (physician, nurse, etc.), proportion who would consider discussing their weight with the following healthcare professionals. Abbreviations: HCP, healthcare professional; PwO, people with obesity.

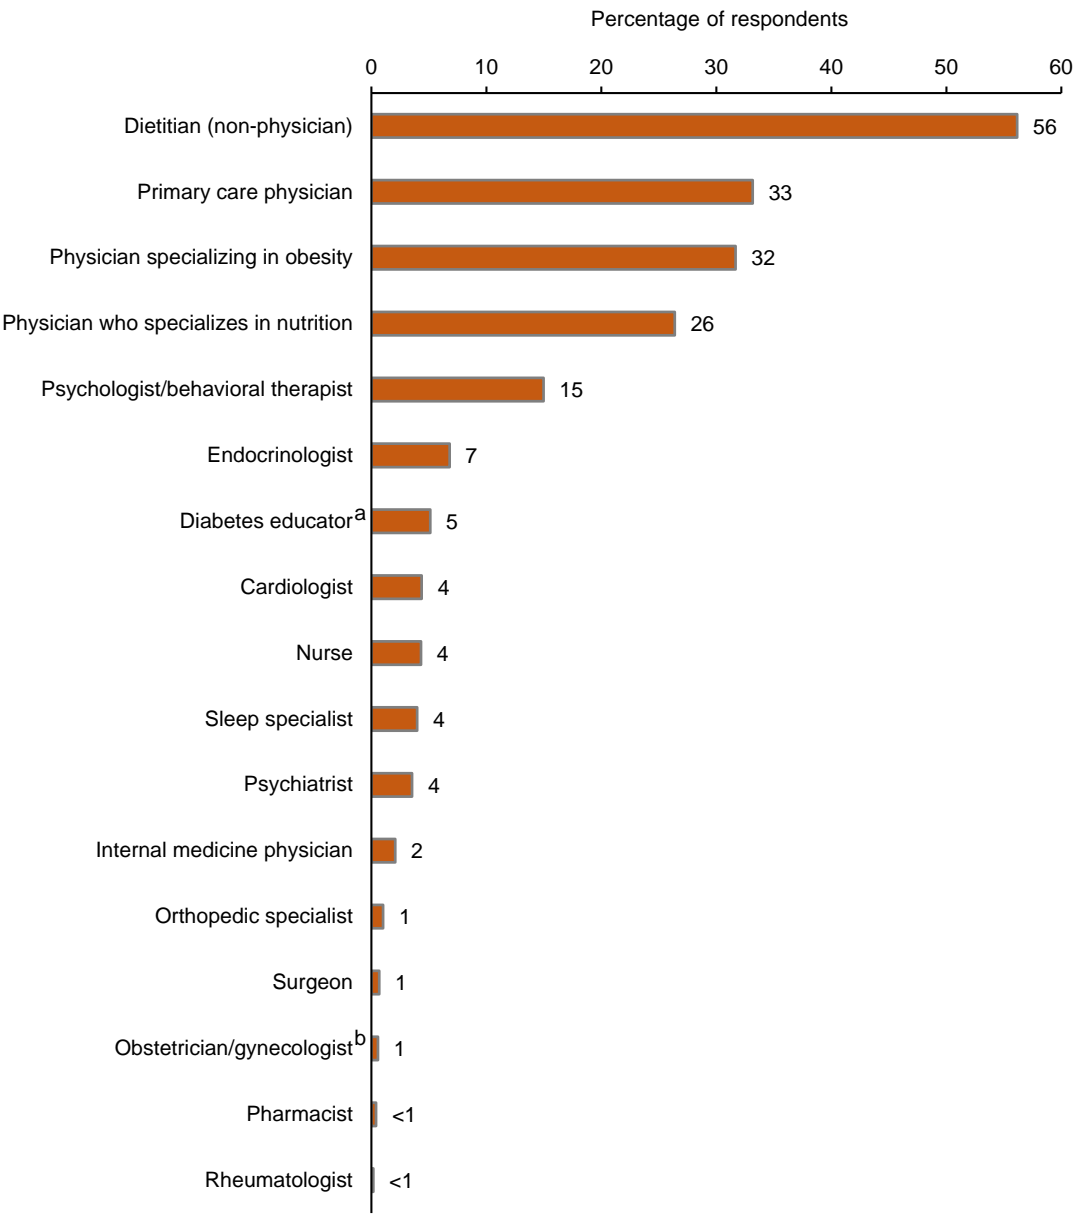

PwO who have not discussed weight with HCP, *n* = 239; Q121A.

<sup>a</sup>Diabetes educator not shown in some countries;

<sup>b</sup>Obstetrician/gynecologist not shown for males.

Additional file 1

**FIGURE S10** Healthcare professionals considered most effective in helping PwO

Proportion of physicians who considered the following healthcare professionals most effective in helping PwO achieve their weight loss goals. Abbreviations: PwO, people with obesity.

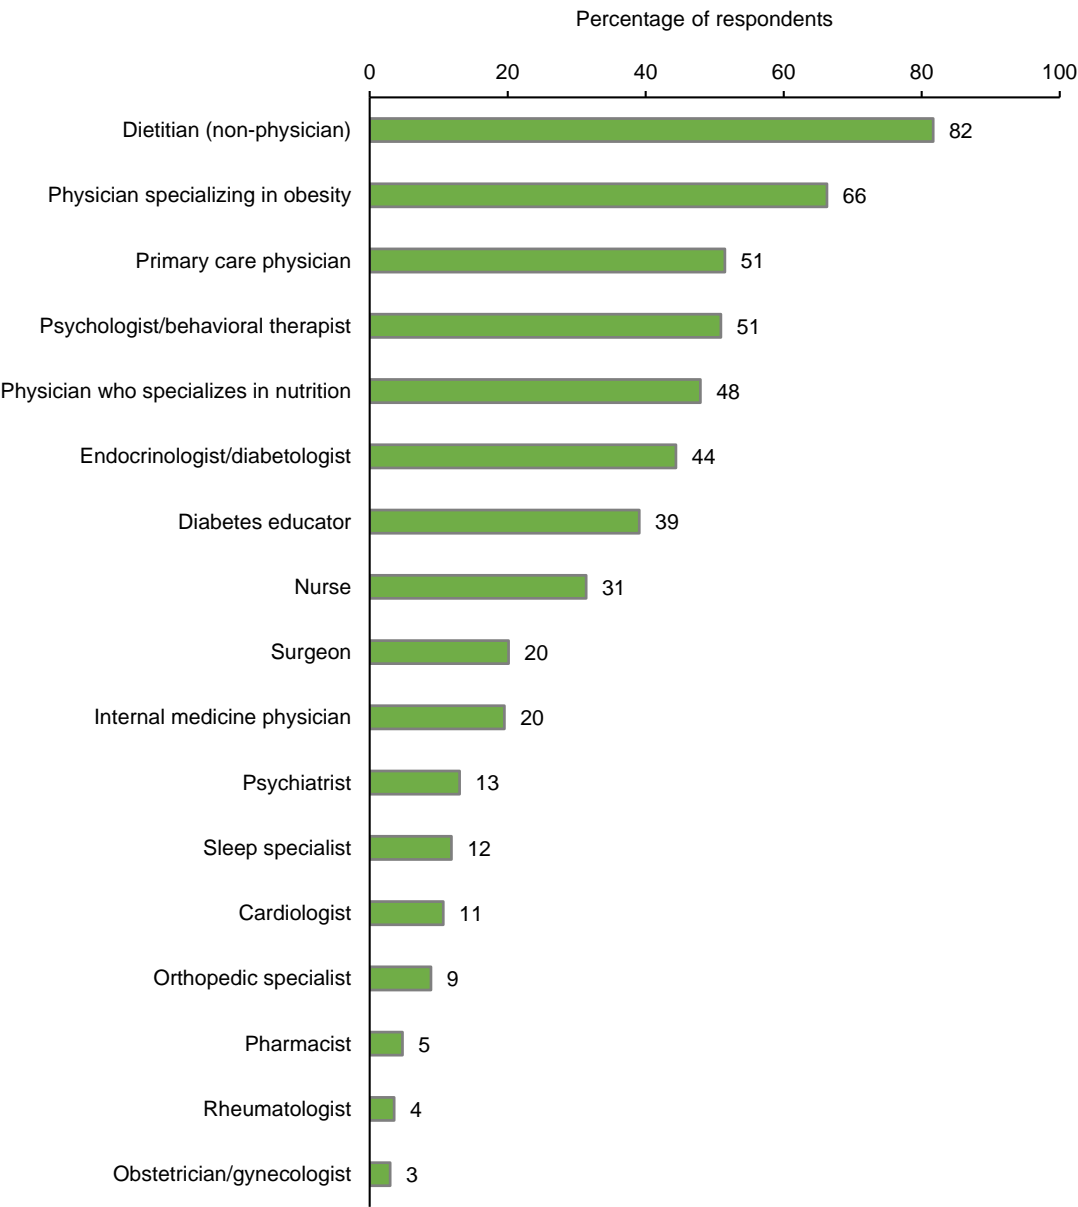

HCP, *n* = 169; Q520.
